# Supplementary material for: Spatial Heterogeneity and Risk Maps of Community Infestation by Triatoma infestans in Rural Northwestern Argentina
Source: PubMed Central journal article supplement (PMC3419179; doi:10.1371/journal.pntd.0001788), 2012-08-14

**Figure S1. Distribution of communities and landscape characteristics of the Moreno Department, Santiago del Estero, Argentina.** Inset shows the location of Moreno within Santiago del Estero Province and Argentina.

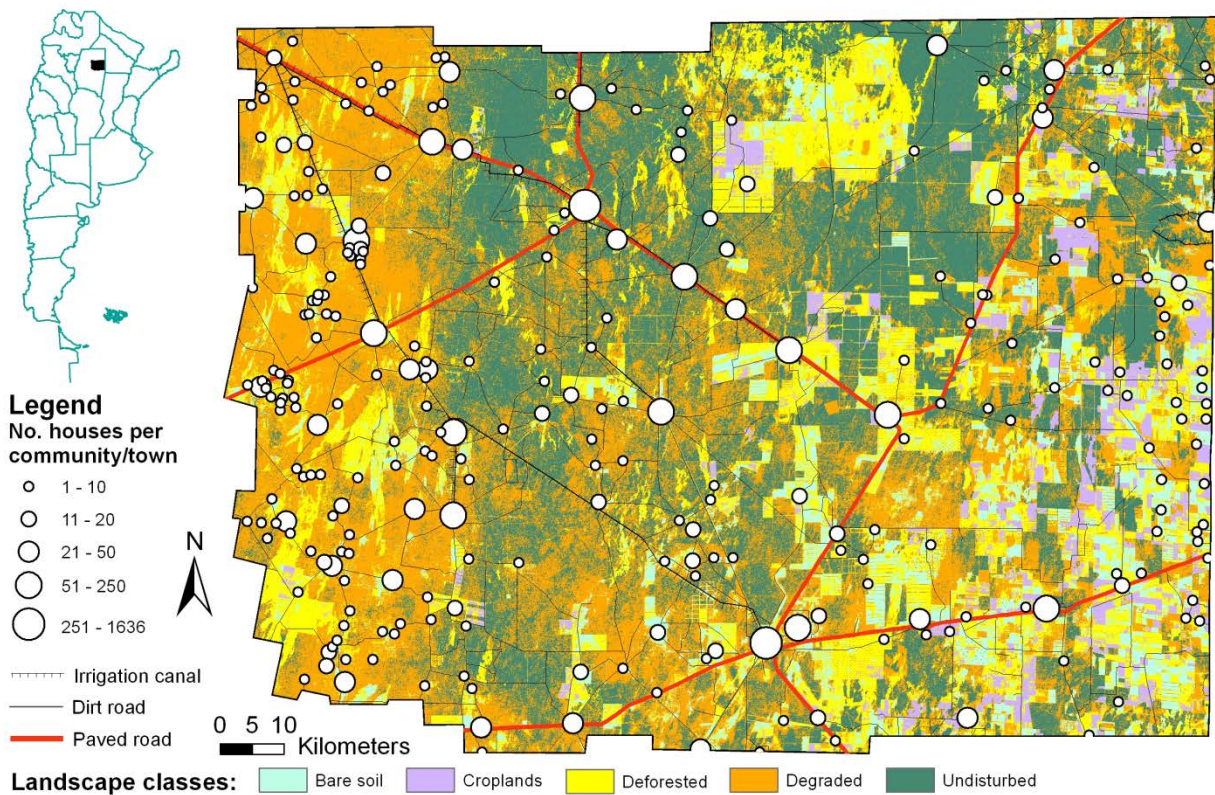

Supplement: pntd.0001788.s001.pdf [file pntd.0001788.s001.pdf]
