# Supplementary material for: Spatial Heterogeneity and Risk Maps of Community Infestation by Triatoma infestans in Rural Northwestern Argentina
Source: PubMed Central journal article supplement (PMC3419179; doi:10.1371/journal.pntd.0001788), 2012-08-14

**Figure S2.** Maximum absolute  $G_i^*(d)$  values for the prevalence of *T. infestans* domestic infestation. The distance at which  $G_i^*(d)$  reaches its maximum is considered the scale at which clustering of *T. infestans* prevalence is maximized. For Moreno, such distance was 24 km.

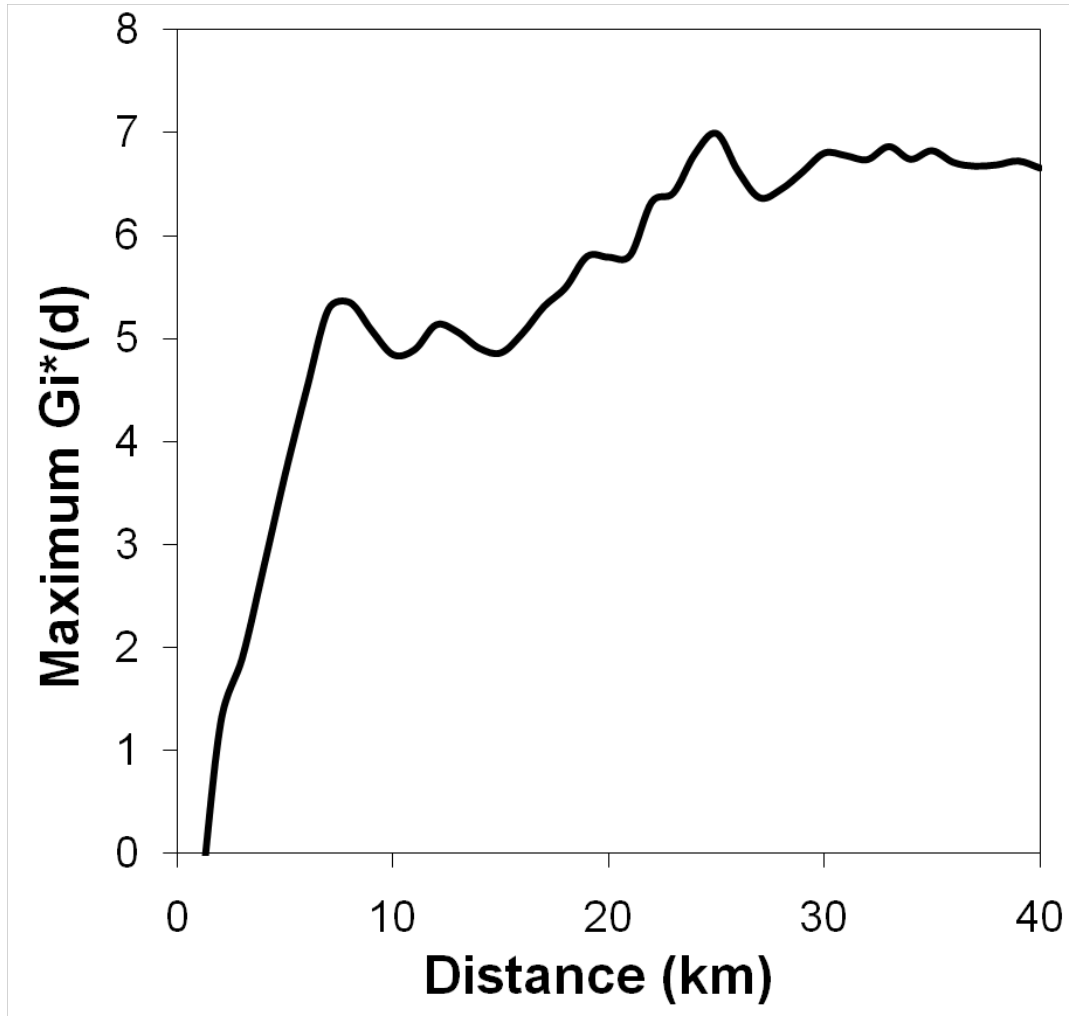

Supplement: pntd.0001788.s002.pdf [file pntd.0001788.s002.pdf]
