# Supplementary material for: Spatial Heterogeneity and Risk Maps of Community Infestation by Triatoma infestans in Rural Northwestern Argentina
Source: PubMed Central journal article supplement (PMC3419179; doi:10.1371/journal.pntd.0001788), 2012-08-14

**Figure S3.** Scatterplot showing the best multiple linear regression predicted prevalence of *T. infestans* domestic infestation versus the observed infestation in the test dataset. The model predictions were compared with a subset of 44 communities not included in the model (test dataset). The diagonal line indicates perfect agreement between model and data.

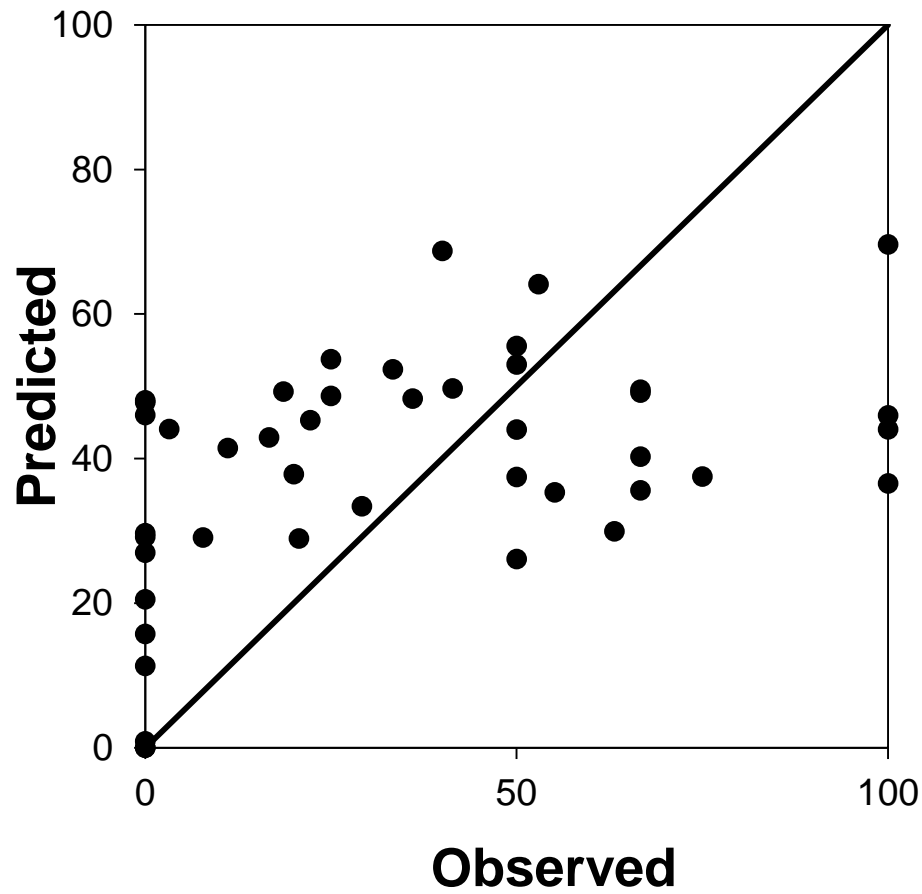

Supplement: pntd.0001788.s003.pdf [file pntd.0001788.s003.pdf]
